# Supplementary material for: Inhibition of H3K9 methyltransferases G9a/GLP prevents ototoxicity and ongoing hair cell death
Source: PubMed Central journal article supplement — Cell Death Dis. 2013 Feb 21;4(2):e506–. doi: 10.1038/cddis.2013.28 (PMC3734817; doi:10.1038/cddis.2013.28), 2013-02-21
Supplement: cddis201328x1.pdf [file cddis201328x1.pdf]

## Supplementary information

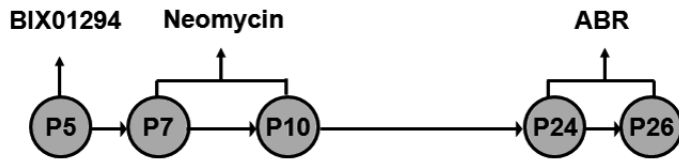

Supplementary Figure 1 A schematic drawing of the *in vivo* study design as described in the Materials and Methods.

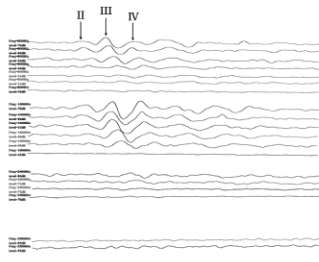

Neo

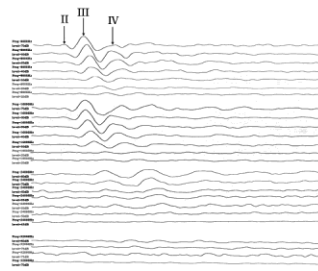

BIX

Supplementary Figure 2 The typical ABR threshold was compared between the ears with or without BIX01294 pre-treatment.
